# Supplementary material for: Design of Mesoporous Silica Nanoparticles for the Treatment of Amyotrophic Lateral Sclerosis (ALS) with a Therapeutic Cocktail Based on Leptin and Pioglitazone
Source: PubMed Central journal article supplement (PMC9667463; doi:10.1021/acsbiomaterials.2c00865), 2022-10-14
Supplement: ab2c00865_si_002.pdf [file ab2c00865_si_002.pdf]

**Design of mesoporous silica nanoparticles for the treatment of Amyotrophic Lateral Sclerosis (ALS) with a therapeutic cocktail based on leptin and pioglitazone**

*Diana Díaz-García,<sup>a</sup> Águeda Ferrer-Donato,<sup>b</sup> José M. Méndez-Arriaga,<sup>a</sup> Marta Cabrera Pinto,<sup>b</sup> Miguel Díaz-Sánchez,<sup>a</sup> Sanjiv Prashar,<sup>a</sup> Carmen M. Fernandez-Martos,<sup>b,c\*</sup> Santiago Gómez-Ruiz<sup>a,\*</sup>*

*<sup>a</sup> COMET-NANO Group, Departamento de Biología y Geología, Física y Química Inorgánica, E.S.C.E.T., Universidad Rey Juan Carlos, Calle Tulipán s/n, E-28933 Móstoles, Madrid, Spain*

*<sup>b</sup> Neurometabolism Group, Research Unit of the National Hospital of Paraplegics (UDI-HNP), Toledo. Finca La Peraleda s/n, Toledo 45007, Spain.*

*<sup>c</sup> Wicking Dementia Research and Education Centre, College of Health and Medicine, University of Tasmania, Hobart, Tasmania, Australia.*

This supporting information contains:

- 1) SEM images of the starting material MSN (**Figure S1**), MSN-PIO and MSN-LEP-PIO (**Figure S2**).
- 2) FT-IR spectra of the series (**Figure S3**)
- 3) Quantification of Si internalization by ICP (**Table S1**)

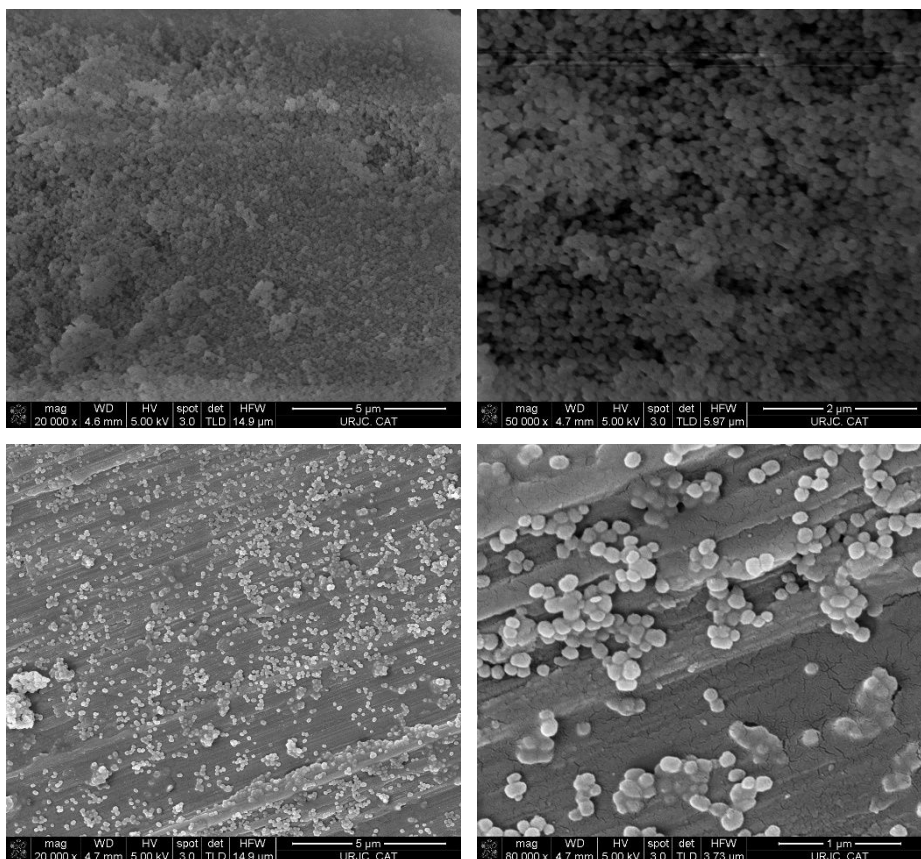

Figure S1. SEM images of MSN nanoparticles.

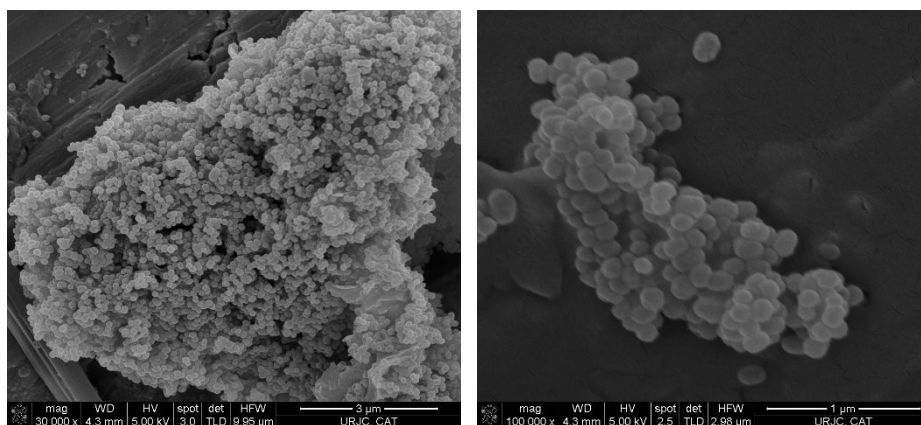

Figure S2. SEM images of MSN-PIO (left) and MSN-LEP-PIO (right).

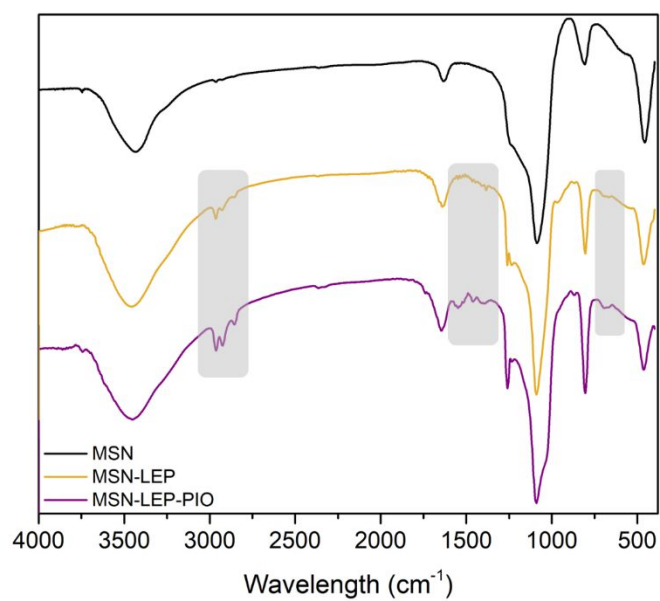

**Figure S3.** FT-IR spectra os MSN-LEP-PIO series.

**Table S1.** Si concentration accumulated in selected treated mouse tissues.

| <b>Tissue</b> | <b>% Si</b> | <b>ppm Si</b> |
|---------------|-------------|---------------|
| TG1 FCI       | 35.49       | 7346          |
| TG2 FCI       | 38.54       | 4817          |
| TG3 FCI       | 28.72       | 2342          |
| TG3 SC        | 72.77       | 3232          |
